# Supplementary material
Source: PubMed Central journal article supplement (PMC4973184)
Supplement: SD4.pdf [file SD4.pdf]

SUPPLEMENTAL TABLE 1  
Primer sequences and polymerase chain reaction parameters

| Target                     | Primer sequences (5'-3')                                          | Reaction conditions                                                                                        | Cycling parameters                                                                                                   | Ref                                                                                                                                     |
|----------------------------|-------------------------------------------------------------------|------------------------------------------------------------------------------------------------------------|----------------------------------------------------------------------------------------------------------------------|-----------------------------------------------------------------------------------------------------------------------------------------|
| <i>pfl dh</i>              | For: ACGATTGGCTGGAGCAGAT<br>Rev: TCTCTATCCATTCT<br>TTGTCACCTCTTTC | 300 nM primers<br>250 nM probe                                                                             | 50°C × 2 minutes<br>95°C × 10 minutes                                                                                | 10                                                                                                                                      |
|                            | Probe: FAM-AGTAATAGTAACAGCTG<br>GATTACCAAGGCCCA-TAMRA             | Universal Probe Master mix<br>(Roche, Indianapolis, IN)<br>1 or 4 µL template DNA<br>25 µL reaction volume | 40 cycles of 95°C ×<br>15 seconds, 60°C × 1 minute                                                                   |                                                                                                                                         |
| <i>Plasmodium malariae</i> | For: CAACTGCACGTCGTTAGACTTTG<br>Rev: GCTGGTGTACTGCCTTTGTC         | 500 nM primers<br>SYBR Green Master mix (Roche)<br>2 µL template DNA<br>25 µL reaction volume              | 95°C × 10 minutes<br>40 cycles of 95°C ×<br>15 seconds, 60°C × 1 minutes<br>Melt curve: 60–95°C,<br>1.6°C increments | 11                                                                                                                                      |
|                            | <i>Plasmodium ovale</i>                                           | For: GGKCTTGGTGTTCCTTCA<br>Rev: TGTGRGCATTTCTAAAACG                                                        | 500 nM primers<br>SYBR Green Master mix (Roche)<br>2 µL template DNA<br>25 µL reaction volume                        |                                                                                                                                         |
| <i>Plasmodium vivax</i>    |                                                                   | For: ACCCGTGACGTCCTTCTTC<br>Rev: GGTGCCCTTGCTGTTGTAC                                                       | 500 nM primers<br>SYBR Green Master mix (Roche)<br>2 µL template DNA<br>25 µL reaction volume                        | 50°C × 2 minutes<br>95°C × 10 minutes<br>40 cycles of 95°C ×<br>15 seconds, 60°C × 1 minute<br>Melt curve: 60–95°C,<br>1.6°C increments |
|                            | <i>hrp2</i>                                                       | For: ATTCCGCATTTAATAA<br>TAACCTGTGTAGC<br>Rev: ATGGCGTAGGCAATGTGTGG                                        | 400 nM primers<br>HotStarTaq Master mix (Roche)<br>3 µL template DNA<br>25 µL reaction volume                        | 95°C × 15 minutes<br>35 cycles of 94°C ×<br>30 seconds, 59°C × 30 seconds,<br>72°C × 1 minute<br>72°C × 10 minutes                      |
| TARE-2                     |                                                                   | For: CTATGTTGCACTTA<br>CATGCAYAAT<br>Rev: TGACCTAAGAAGTA<br>VAATAATGATGA                                   | 200 nM primers<br>SYBR Green Master Mix (Roche)<br>4 µL template DNA<br>25 µL reaction volume                        | 50°C × 2 minutes<br>95°C × 10 minutes<br>40 cycles of 95°C × 15 seconds,<br>60°C × 1 minute<br>Melt curve: 60–95°C,<br>1.6°C increments |

For = forward; *hrp2* = histidine-rich protein 2 gene; *pfl dh* = falciparum-specific lactate dehydrogenase gene; Ref = reference; Rev = reverse; TARE-2 = telomere-associated repetitive element-2.

SUPPLEMENTAL TABLE 2  
Risk factors for subpatent malaria

| Covariate     | Crude OR | 95% CI    | Adjusted OR* | 95% CI    | P value |
|---------------|----------|-----------|--------------|-----------|---------|
| Age < 5 years | 1.57     | 1.04–2.36 | 1.61         | 1.09–2.38 | 0.02    |
| Bed net use   | 1.22     | 0.73–2.03 | 1.11         | 0.65–1.89 | 0.70    |
| Anemia        | 0.94     | 0.34–2.56 | 0.90         | 0.33–2.45 | 0.83    |

CI = confidence interval; OR = odds ratio.

\*The following covariates were included in the models based on directed acyclic graphs as follows: 1) for age, by including hemoglobin and malaria treatment within the prior 2 weeks in the model; 2) for bed net use, by including electricity in the home and age in years; and 3) for anemia, by including gender, age in years, and bed net use.
